# Supplementary material
Source: publisher site journal article supplement (https://www.dovepress.com/article/417974)
Supplement: Supplementary file 1 [file get_supplementary_file.php]

**Table S1. Sequence of probes used in quantitative reverse transcription-PCR**

| **Primer Name** | **Primer Sequence** | **Orientation** |
| --- | --- | --- |
| hTLR7_qF | TCCTTGGGGCTAGATGGTTTC | fwd |
| hTLR7_qR | TCCACGATCACATGGTTCTTTG | rev |
| hTLR3_qF | GCCATGAAGTTGCTGACTGC | fwd |
| hTLR3_qR | TGGCGGCTGGTAATCTTCTG | rev |
| hTLR9_qF | CTGCCACATGACCATCGAG | fwd |
| hTLR9_qR | GGACAGGGATATGAGGGATTTGG | rev |
| hAHR_qF | CAAATCCTTCCAAGCGGCATA | fwd |
| hAHR_qR | CGCTGAGCCTAAGAACTGAAAG | rev |
| h Integrin α4_qF | TGCAAGGTTTTGTGCCCATGAA | fwd |
| h Integrin α4_qR | TCAAGTTGTACCACGCCAGAGT | rev |
| h Integrin β2_qF | AAGTGACGCTTTACCTGCGAC | fwd |
| h Integrin β2_qR | AAGCATGGAGTAGGAGAGGTC | rev |
| hCCR3_qF | TGGCATGTGTAAGCTCCTCTC | fwd |
| hCCR3_qR | CCTGTCGATTGTCAGCAGGATTA | rev |
| hCCR5_qF | TTACTGTCCCCTTCTGGGCT | fwd |
| hCCR5_qR | AAGCAAACACAGCATGGACG | rev |
| hIL5Rα_qF | TTTGCCCTTCACGCCATTGAT | fwd |
| hIL5Rα_qR | TGGATAGAGAGACGAGTTCCTTC | rev |
| hIL17RA_qF | GACACTCCGCGACTGTTTC | fwd |
| hIL17RA_qR | GCCCGTGATGAACCAGTACAC | rev |
| hIL4Rα_qF | CGTGGTCAGTGCGGATAACTA | fwd |
| hIL4Rα_qR | TGGTGTGAACTGTCAGGTTTC | rev |
| hCRTH2_qF | GACTTGGGGTCAGAGACTGC | fwd |
| hCRTH2_qR | CTTCAGTGACCCTGGCCTTT | rev |
| hTGF-B_qF | GGCCAGATCCTGTCCAAGC | fwd |
| hTGF-B_qR | GTGGGTTTCCACCATTAGCAC | rev |
| hFcRIa_qF | TAAAAGCTCCGCGTGAGAAGT | fwd |
| hFcRIa_qR | AGGATGTGGGTTCAGAAGTCT | rev |
| hBeta-actin_qF | GATCATTGCTCCTCCTGAGC | fwd |
| HBeta-actin_qR | CACCTTCACCGTTCCAGTTT | rev |

**Figure S1.** mRNA expression levels in unstimulated eosinophils (30min PBS treatment) of Late-onset asthma (LOA), early-onset asthma (EOA) and normal control (NC). Post-hoc analysis. *: p<0.05; **: p<0.01; ***: p<0.001.

**Figure S2**. mRNA expression of intergrin α4 in eosinophils of late-onset asthma (LOA), early-onset asthma (EOA) and normal control (NC) stimulated using **A**. IL-5 or **B**. IL17 for 30 min, 1 hour, or 3 hours. **: p<0.01; ***: p<0.001.

**Figure S3**. mRNA expression of intergrin β2 in eosinophils of late-onset asthma (LOA), early-onset asthma (EOA) and normal control (NC) stimulated using **A**. IL-5 or **B**. IL17 for 30 min, 1 hour, or 3 hours. *: p<0.05; ***: p<0.001; ****: p<0.0001.

**Figure S4**. mRNA expression of CCR3 in eosinophils of late-onset asthma (LOA), early-onset asthma (EOA) and normal control (NC) stimulated using **A**. IL-5 or **B**. IL17 for 30 min, 1 hour, or 3 hours. *: p<0.05; **: p<0.01.

**Figure S5**. mRNA expression of CCR5 in eosinophils of late-onset asthma (LOA), early-onset asthma (EOA) and normal control (NC) stimulated using **A**. IL-5 or **B**. IL17 for 30 min, 1 hour, or 3 hours *: p<0.05.

**Figure S6**. mRNA expression of IL-5Ra in eosinophils of late-onset asthma (LOA), early-onset asthma (EOA) and normal control (NC) stimulated using **A**. IL-5 or **B**. IL17 for 30 min, 1 hour, or 3 hours *: p<0.05; ***: p<0.001.

**Figure S7**. mRNA expression of IL-17Ra in eosinophils of late-onset asthma (LOA), early-onset asthma (EOA) and normal control (NC) stimulated using **A**. IL-5 or **B**. IL17 for 30 min, 1 hour, or 3 hours. *: p<0.05; **: p<0.01; ***: p<0.001.

**Figure S8**. mRNA expression of IL-4Ra in eosinophils of late-onset asthma (LOA), early-onset asthma (EOA) and normal control (NC) stimulated using **A**. IL-5 or **B**. IL17 for 30 min, 1 hour, or 3 hours. *: p<0.05; **: p<0.01; ***: p<0.001; ****: p<0.0001.

**Figure S9**. mRNA expression of CRTH2 in eosinophils of late-onset asthma (LOA), early-onset asthma (EOA) and normal control (NC) stimulated using **A**. IL-5 or **B**. IL17 for 30 min, 1 hour, or 3 hours. *: p<0.05; **: p<0.01; ***: p<0.001; ****: p<0.0001.

**Figure S10**. mRNA expression of FcεR1 in eosinophils of late-onset asthma (LOA), early-onset asthma (EOA) and normal control (NC) stimulated using **A**. IL-5 or **B**. IL17 for 30 min, 1 hour, or 3 hours. *: p<0.05; **: p<0.01.

**Figure S11**. mRNA expression of TGF-β1 in eosinophils of late-onset asthma (LOA), early-onset asthma (EOA) and normal control (NC) stimulated using **A**. IL-5 or **B**. IL17 for 30 min, 1 hour, or 3 hours. *: p<0.05; ***: p<0.001.

**Figure S12**. mRNA expression of AHR in eosinophils of late-onset asthma (LOA), early-onset asthma (EOA) and normal control (NC) stimulated using **A**. IL-5 or **B**. IL17 for 30 min, 1 hour, or 3 hours. *: p<0.05.

**Figure S13**. mRNA expression of TLR-3 in eosinophils of late-onset asthma (LOA), early-onset asthma (EOA) and normal control (NC) stimulated using **A**. IL-5 or **B**. IL17 for 30 min, 1 hour, or 3 hours. *: p<0.05.

**Figure S14**. mRNA expression of TLR-7 in eosinophils of late-onset asthma (LOA), early-onset asthma (EOA) and normal control (NC) stimulated using **A**. IL-5 or **B**. IL17 for 30 min, 1 hour, or 3 hours. *: p<0.05; **: p<0.01; ***: p<0.001; ****: p<0.0001.

**Figure S15**. mRNA expression of TLR-9 in eosinophils of late-onset asthma (LOA), early-onset asthma (EOA) and normal control (NC) stimulated using **A**. IL-5 or **B**. IL17 for 30 min, 1 hour, or 3 hours. **: p<0.01; ***: p<0.001.
